# Supplementary material
Source: PubMed Central journal article supplement (PMC5321226)
Supplement: 10.1194_M072066_jlr.M072066-1.pdf [file 10.1194_M072066_jlr.M072066-1.pdf]

**Supplementary Table S1. Sequence of primers of mouse genes used in quantitative Real-time PCR analysis**

| <b>Primer</b>   | <b>Forward Sequence (5'-3')</b> | <b>Reverse Sequence (5'-3')</b> |
|-----------------|---------------------------------|---------------------------------|
| mCeacam1        | AATCTGCCCCTGGCGCTTGGAGCC        | AAATCGCACAGTCGCCTGAGTACG        |
| rCeacam1        | CCCGGTCAGTTTCAGGATAA            | GAAGAGGCTGAAGTTGGTCG            |
| Gfp             | GAGTACAACACTACAACAGCCAC         | CTTGAAGTTCACCTTGATGCC           |
| Srebp-1c        | GGAGCCATGGATTGCACATT            | GCTTCCAGAGAGGAGGCCA             |
| Fasn            | ACTGTGAGAAGCATGTCCCTGGAA        | AAGCAACCTCCACTCCTCTGCTTA        |
| Cd36            | TCTTGGCTACAGCAAGGCGACATA        | AGCTATGCAGCATGGAACATGACG        |
| Fatp-1          | GCAGAAGACGCAGGAAGA              | GGACGTGGCTGTGTATGG              |
| Fatp-4          | GTGAGATGGCCTCAGCTATC            | GAAGAGGGTCCAGATGCTCT            |
| Lpl             | AAGGTCAGAGCCAAGAGAAGCA          | CCAGAAAAGTGAATCTTGACTTGGT       |
| Cpt-1 $\alpha$  | AAGGCAGAAGAGTGGGCTTTCACT        | ACCTTGGCTGCGGTAAGACTATGT        |
| Fgf-21          | CCTCTAGGTTTCTTTGCCAACAG         | AAGCTGCAGGCCTCAGGAT             |
| Ucp-1           | GGATGGTGAACCCGACAACCT           | AACTCCGGCTGAGAAGATCTTG          |
| Hsl             | GGCTTACTGGGCACAGATACCT          | CTGAAGGCTCTGAGTTGCTCAA          |
| Cd68            | CCTCGCCCTAGTCCAAGGTC            | GGATTCGGATTTGAATTTGGGCT         |
| F4/80           | CAAGGAGGACAGAGTTTATCGTG         | CTTTGGCTATGGGCTTCCAGTC          |
| IL-1 $\beta$    | CCCTGCAGCTGGAGAGTGTGG           | TATTCTGTCCATTGAGGTGGAG          |
| IL-6            | CTTGGGACTGCCGCTGGTGA            | TGCAAGTGCATCATCGTTGT            |
| Tnf- $\alpha$   | CCACCACGCTCTTCTGTCTAC           | AGGGTCTGGGCCATAGAACT            |
| Ifn- $\gamma$   | ATG AAC GCT ACA CAC TGC ATC     | CCA TCC TTT TGC CAG TTC CTC     |
| Col6 $\alpha$ 3 | GTCAGCTGAGTCTTGTGCTGT           | ACCTAGAGAACGTTACCTCACT          |
| $\alpha$ -Sma   | CGTGGCTATTCCTTCGTTAC            | TGCCAGGAGACTCCATCC              |
| Tgf- $\beta$    | GTGGAAATCAACGGGATCAG            | ACTTCCAACCCAGGTCCTTC            |
| Smad7           | GTT GCT GTG AAT CTT ACG GG      | ATC TGG ACA GCC TGC A           |
| 18S             | TTCGAACGTCTGCCCTATCAA           | ATGGTAGGCACGGCGACTA             |

**Supplementary Table S2. Effect of nicotinic acid on the transcript levels of inflammatory and fibrotic markers in white adipose tissue**

|                     | <b>RD-S</b> | <b>HF-S</b>               | <b>HF-NA</b>                |
|---------------------|-------------|---------------------------|-----------------------------|
| <b>Inflammation</b> |             |                           |                             |
| Cd68                | 5.62 ± 1.16 | 9.87 ± 1.38 <sup>a</sup>  | 17.02 ± 0.82 <sup>a,b</sup> |
| F4/80               | 6.66 ± 1.96 | 14.51 ± 1.96 <sup>a</sup> | 21.66 ± 0.78 <sup>a,b</sup> |
| Il-1β               | 4.07 ± 0.58 | 5.35 ± 0.43               | 11.70 ± 0.54 <sup>a,b</sup> |
| Il-6                | 3.76 ± 0.81 | 5.43 ± 0.58               | 12.93 ± 1.17 <sup>a,b</sup> |
| Tnf-α               | 2.29 ± 0.46 | 6.39 ± 0.96 <sup>a</sup>  | 12.83 ± 0.48 <sup>a,b</sup> |
| Ifn-γ               | 7.78 ± 1.93 | 8.36 ± 1.27               | 15.39 ± 0.62 <sup>a,b</sup> |
| <b>Fibrosis</b>     |             |                           |                             |
| Col6α3              | 3.18 ± 0.77 | 12.73 ± 0.77 <sup>a</sup> | 8.72 ± 0.99 <sup>a,b</sup>  |
| α-Sma               | 1.36 ± 0.41 | 4.53 ± 0.46 <sup>a</sup>  | 2.70 ± 0.45 <sup>b</sup>    |
| Tgf-β               | 1.43 ± 0.37 | 4.84 ± 0.62 <sup>a</sup>  | 2.53 ± 0.42 <sup>b</sup>    |
| Smad7               | 3.91 ± 0.55 | 1.43 ± 0.19 <sup>a</sup>  | 3.09 ± 0.43 <sup>b</sup>    |

Mice (3 months of age, n=5/group) were fed RD or HF for 30 days. In the last 2 days of feeding, mice were injected with a daily dose of nicotinic acid (NA). WAT extracts were analyzed by qRT-PCR in duplicate using the primers listed in Table S1. Gene expression was normalized to 18S. Values are expressed as mean ± SEM.

<sup>a</sup>*P* < 0.05 vs RD-GFP; <sup>b</sup>*P* < 0.05 HF-NA vs HF-S.

**Supplementary Table S3. Effect of Adenoviral-redelivery of CEACAM1 on the mRNA levels of genes involved in lipid metabolism, inflammation and fibrosis in liver 21 days post-adenoviral injection**

|                         | RD-GFP      | HF-GFP                     | HF-rWT                   | HF-rSA                     |
|-------------------------|-------------|----------------------------|--------------------------|----------------------------|
| <b>Lipid Metabolism</b> |             |                            |                          |                            |
| Srebp-1c                | 1.89 ± 0.24 | 4.11 ± 0.97 <sup>a,c</sup> | 1.80 ± 0.49 <sup>b</sup> | 3.75 ± 0.70 <sup>a,c</sup> |
| Fasn                    | 0.37 ± 0.09 | 0.95 ± 0.20 <sup>a,c</sup> | 0.38 ± 0.07 <sup>b</sup> | 1.37 ± 0.16 <sup>a,c</sup> |
| Cd36                    | 0.57 ± 0.18 | 2.59 ± 0.74 <sup>a,c</sup> | 0.79 ± 0.23 <sup>b</sup> | 2.62 ± 0.84 <sup>a,c</sup> |
| Fatp-1                  | 0.68 ± 0.05 | 1.42 ± 0.30 <sup>a,c</sup> | 0.59 ± 0.09 <sup>b</sup> | 1.16 ± 0.13 <sup>a,c</sup> |
| Fatp-4                  | 1.03 ± 0.11 | 1.70 ± 0.17 <sup>a,c</sup> | 0.82 ± 0.14 <sup>b</sup> | 1.98 ± 0.32 <sup>a,c</sup> |
| Cpt-1 $\alpha$          | 1.03 ± 0.07 | 0.39 ± 0.07 <sup>a,c</sup> | 1.27 ± 0.30 <sup>b</sup> | 0.27 ± 0.06 <sup>a,c</sup> |
| Fgf-21                  | 0.69 ± 0.10 | 0.35 ± 0.07 <sup>a,c</sup> | 1.02 ± 0.19 <sup>b</sup> | 0.37 ± 0.10 <sup>a,c</sup> |
| <b>Inflammation</b>     |             |                            |                          |                            |
| F4/80                   | 0.80 ± 0.27 | 2.16 ± 0.29 <sup>a,c</sup> | 0.98 ± 0.18 <sup>b</sup> | 2.62 ± 0.46 <sup>a,c</sup> |
| Tnf- $\alpha$           | 1.55 ± 0.32 | 3.46 ± 0.67 <sup>a,c</sup> | 1.30 ± 0.44 <sup>b</sup> | 2.50 ± 0.22 <sup>a,c</sup> |
| <b>Fibrosis</b>         |             |                            |                          |                            |
| Col6 $\alpha$ 3         | 1.48 ± 0.09 | 3.13 ± 0.22 <sup>a,c</sup> | 1.27 ± 0.21 <sup>b</sup> | 3.92 ± 1.42 <sup>a,c</sup> |
| $\alpha$ -Sma           | 0.63 ± 0.09 | 7.06 ± 2.26 <sup>a,c</sup> | 1.60 ± 0.93 <sup>b</sup> | 9.19 ± 2.92 <sup>a,c</sup> |

Mice (2 months of age, n=5/group) were fed RD or HF for 41 days. On the 20<sup>th</sup> day, mice were injected with equal titers of adenoviral particles of Ad-GFP, Ad-rWT and Ad-rSA CEACAM1. Liver extracts were removed 21 days post-injection and analyzed by qRT-PCR in duplicate using the primers listed in Table S1. Gene expression was normalized to 18S. Values are expressed as mean ± SEM. <sup>a</sup>*P* < 0.05 vs RD-GFP; <sup>b</sup>*P* < 0.05 vs HF-GFP; <sup>c</sup>*P* < 0.05 vs HF-rWT.

**Supplementary Table S4. Effect of Adenoviral-redelivery of CEACAM1 on the mRNA levels of genes involved in inflammation in the liver of mice 3 days post-adenoviral injection**

|                     | <b>RD-GFP</b> | <b>HF-GFP</b>            | <b>HF-rWT</b>            | <b>HF-rSA</b>            |
|---------------------|---------------|--------------------------|--------------------------|--------------------------|
| <b>Inflammation</b> |               |                          |                          |                          |
| F4/80               | 0.86 ± 0.04   | 2.89 ± 0.10 <sup>a</sup> | 2.58 ± 0.18 <sup>a</sup> | 2.94 ± 0.04 <sup>a</sup> |
| Tnf- $\alpha$       | 1.33 ± 0.08   | 3.41 ± 0.13 <sup>a</sup> | 2.83 ± 0.15 <sup>a</sup> | 3.16 ± 0.15 <sup>a</sup> |

As in Table S3, except for mice were sacrificed 3 days post-injection and the liver removed to analyze lysates by qRT-PCR in quadruplet using the primers listed in Table S1. Gene expression was normalized to 18S. Values are expressed as mean ± SEM. <sup>a</sup>*P* < 0.05 vs RD-GFP.

**Supplementary Table S5. Effect of Adenoviral-redelivery of CEACAM1 on the mRNA levels of genes involved in adipogenesis, inflammation and fibrosis in white adipose tissue 21 days post-adenoviral injection**

|                           | RD-GFP      | HF-GFP                     | HF-rWT                   | HF-rSA                     |
|---------------------------|-------------|----------------------------|--------------------------|----------------------------|
| <b>Brown adipogenesis</b> |             |                            |                          |                            |
| Ucp-1                     | 0.73 ± 0.21 | 0.26 ± 0.04 <sup>a,c</sup> | 0.83 ± 0.21 <sup>b</sup> | 0.29 ± 0.04 <sup>a,c</sup> |
| <b>Inflammation</b>       |             |                            |                          |                            |
| F4/80                     | 0.29 ± 0.06 | 1.38 ± 0.42 <sup>a,c</sup> | 0.42 ± 0.12 <sup>b</sup> | 1.47 ± 0.49 <sup>a,c</sup> |
| Tnf- $\alpha$             | 0.65 ± 0.12 | 1.91 ± 0.62 <sup>a,c</sup> | 0.53 ± 0.08 <sup>b</sup> | 1.45 ± 0.28 <sup>a,c</sup> |
| <b>Fibrosis</b>           |             |                            |                          |                            |
| Col6 $\alpha$ 3           | 0.67 ± 0.07 | 6.86 ± 3.49 <sup>a,c</sup> | 0.83 ± 0.14 <sup>b</sup> | 4.58 ± 1.94 <sup>a,c</sup> |
| $\alpha$ -Sma             | 0.29 ± 0.04 | 1.08 ± 0.41 <sup>a,c</sup> | 0.24 ± 0.08 <sup>b</sup> | 0.78 ± 0.15 <sup>a,c</sup> |
| Smad7                     | 1.04 ± 0.13 | 0.31 ± 0.09 <sup>a,c</sup> | 1.04 ± 0.20 <sup>b</sup> | 0.39 ± 0.07 <sup>a,c</sup> |

WAT tissues were removed from the male mice (n=5/group) described in Table S3 and their lysates were analyzed by qRT-PCR in duplicate using the primers listed in Table S1. Gene expression was normalized to 18S. Values are expressed as mean ± SEM. <sup>a</sup>*P* < 0.05 vs RD-GFP; <sup>b</sup>*P* < 0.05 vs HF-GFP; <sup>c</sup>*P* < 0.05 vs HF-rWT.
